# Supplementary material for: Mettl3-catalyzed m6A regulates histone modifier and modification expression in self-renewing somatic tissue
Source: PubMed Central journal article supplement — Sci Adv. 2023 Sep 1;9(35):eadg5234. doi: 10.1126/sciadv.adg5234 (PMC10854438; doi:10.1126/sciadv.adg5234), 2023-09-01
Supplement: sciadv.adg5234_sm.pdf [file sciadv.adg5234_sm.pdf]

Supplementary Materials for  
**Mettl3-catalyzed m<sup>6</sup>A regulates histone modifier and modification expression  
in self-renewing somatic tissue**

Alexandra M. Maldonado López *et al.*

Corresponding author: Brian C. Capell, [capellb@pennmedicine.upenn.edu](mailto:capellb@pennmedicine.upenn.edu)

*Sci. Adv.* **9**, eadg5234 (2023)  
DOI: 10.1126/sciadv.adg5234

**The PDF file includes:**

Supplementary Materials and Methods  
Figs. S1 to S6

**Other Supplementary Material for this manuscript includes the following:**

Data S1 and S2

Figure S1

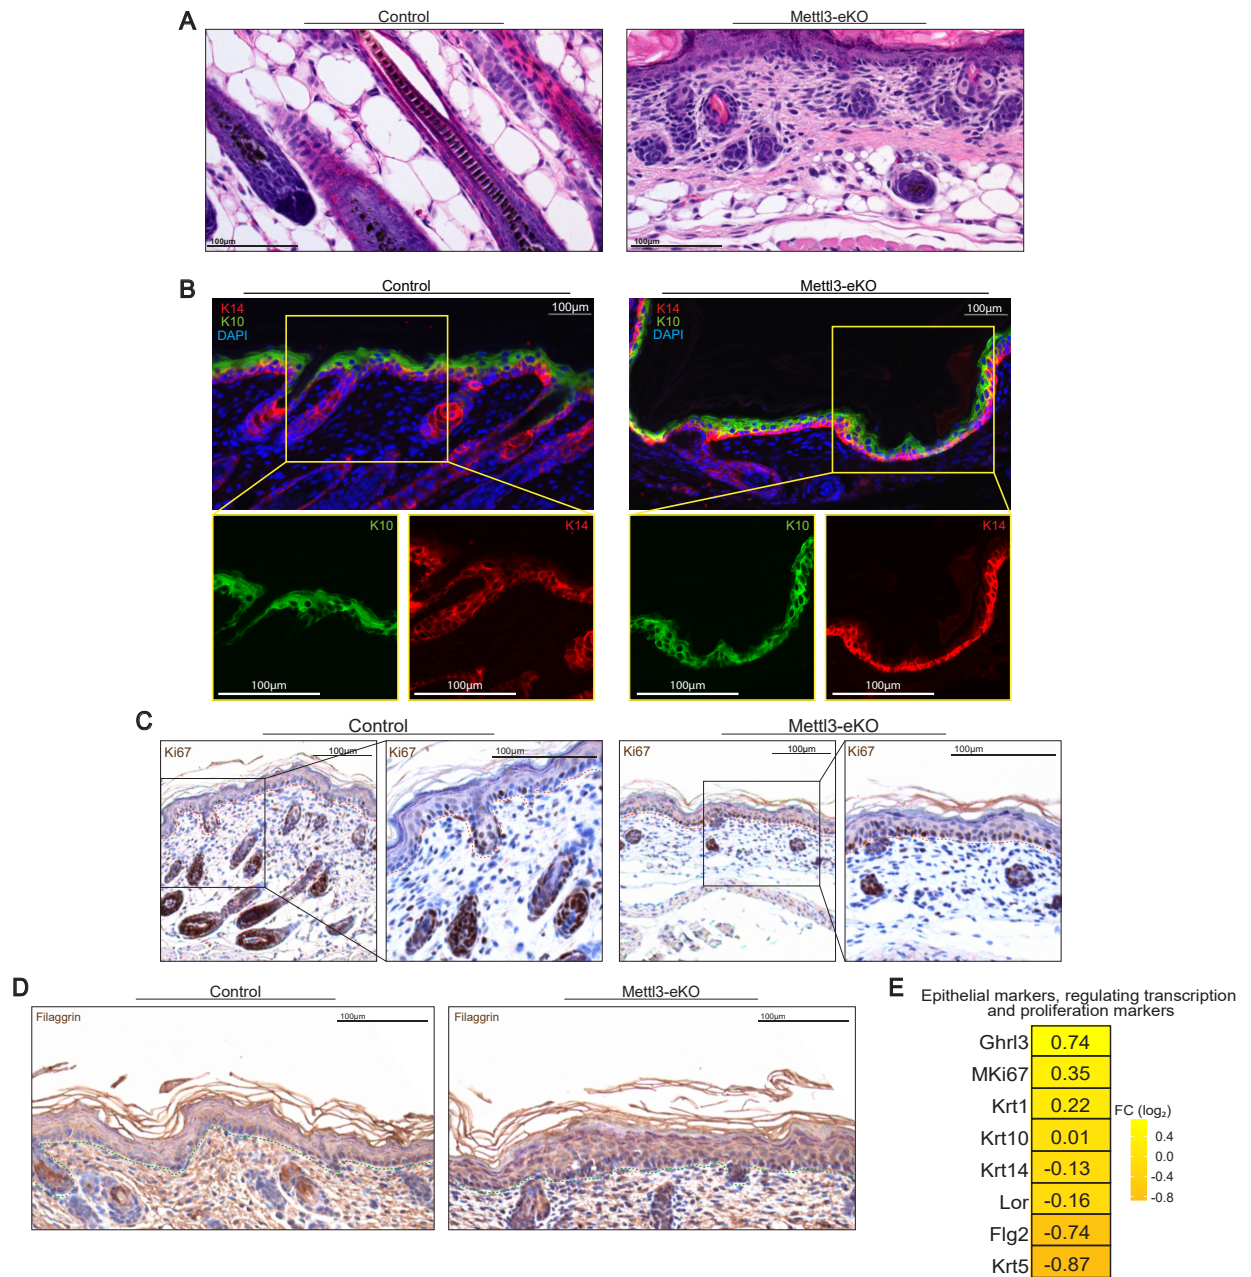

**Fig. S1. Histological analysis of *Mettl3*-eKO murine skin.** (A) *Mettl3*-eKO skin displays underdeveloped, malformed hair follicles. (B) IF of murine dorsal skin of cytokeratin 14 (K14) in the basal layer and cytokeratin 10 (K10) at the suprabasal layer. Controls have distinct basal and suprabasal layers, while there is overlapping staining of both K14 and K10 in the *Mettl3*-eKO epidermis. (C) Ki67 IHC of murine dorsal skin, the dotted orange line demarcates the epidermis-dermis junction. *Mettl3*-eKO epidermis have more positive Ki67 cell staining in the basal layer in comparison to control epidermis. (D) IHC of murine dorsal skin, the dotted green line demarcates the epidermis-dermis junction. Filaggrin is present normally in control and in *Mettl3*-eKO epidermis. (E) Representative markers of epithelial stemness and differentiation and their changes in gene expression by RNA-seq in *Mettl3*-eKO mice epidermis in comparison to WT mice.



Figure S2

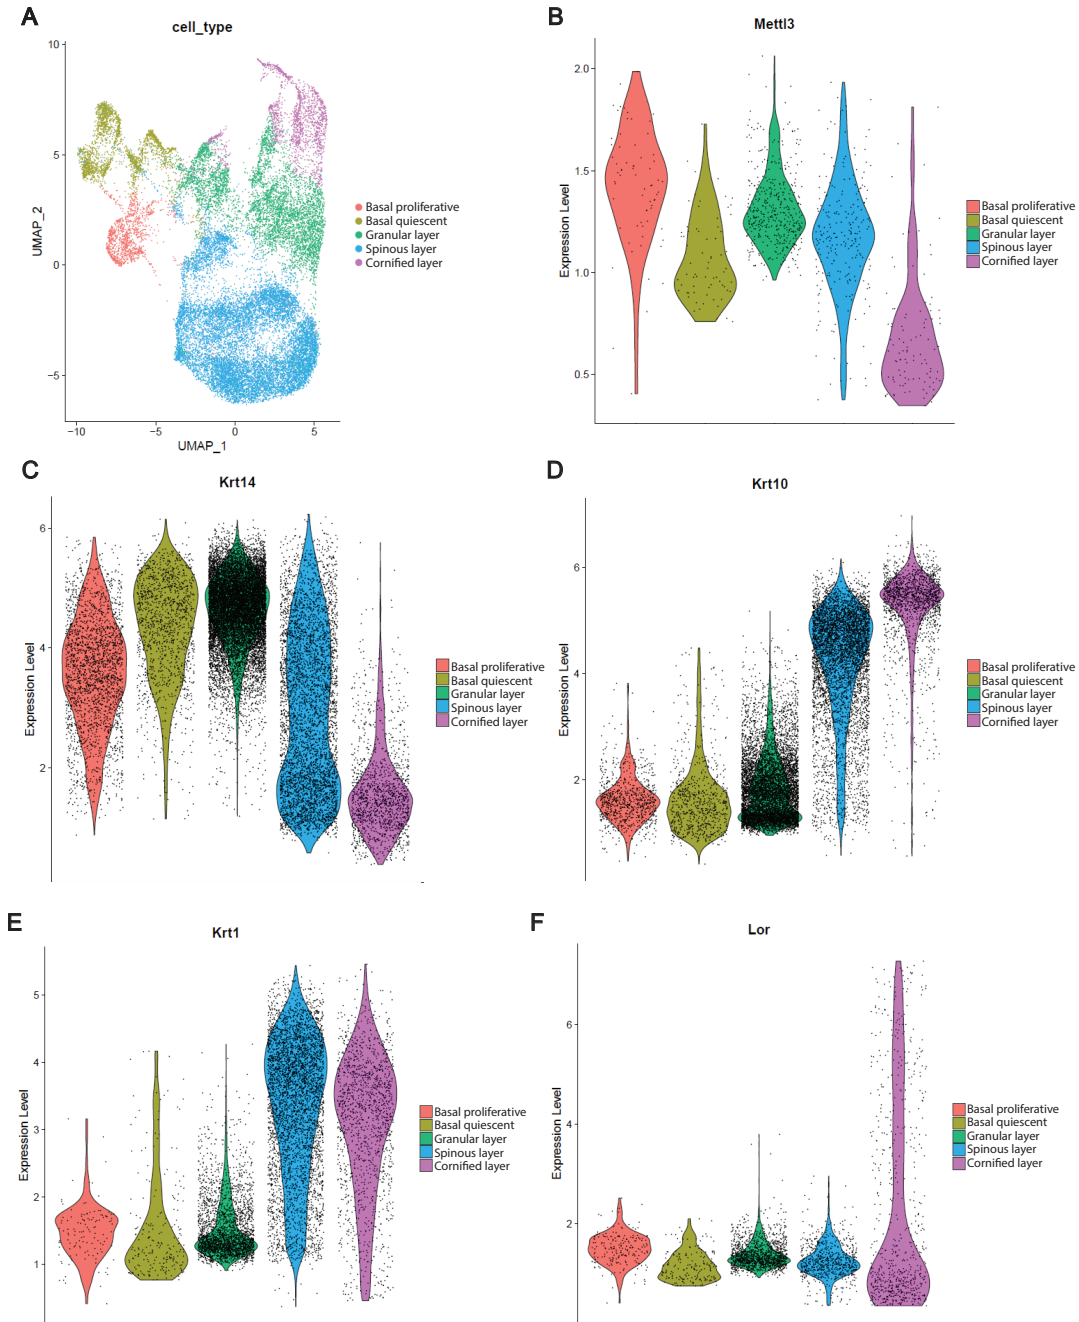

**Fig. S2. Single-cell expression analysis of murine epidermal keratinocytes.** (A) Epidermal cell types identified in mice in a UMAP projection of GSE154679. Violin plots show gene expression in cells on the single-cell level. Each dot represents a single mouse keratinocyte. Statistically significant gene expression is observed only if a violin-shaped fitting area can be calculated. (B) *Mettl3* expression is reduced in the more differentiated cornified layer in comparison to the basal and suprabasal layers of the epidermis similar to what is observed with *Krt14* (C). In contrast, *Krt10* (D), *Krt1* (E), and *Lor* (F) all display increased expression with differentiation.

Figure S3

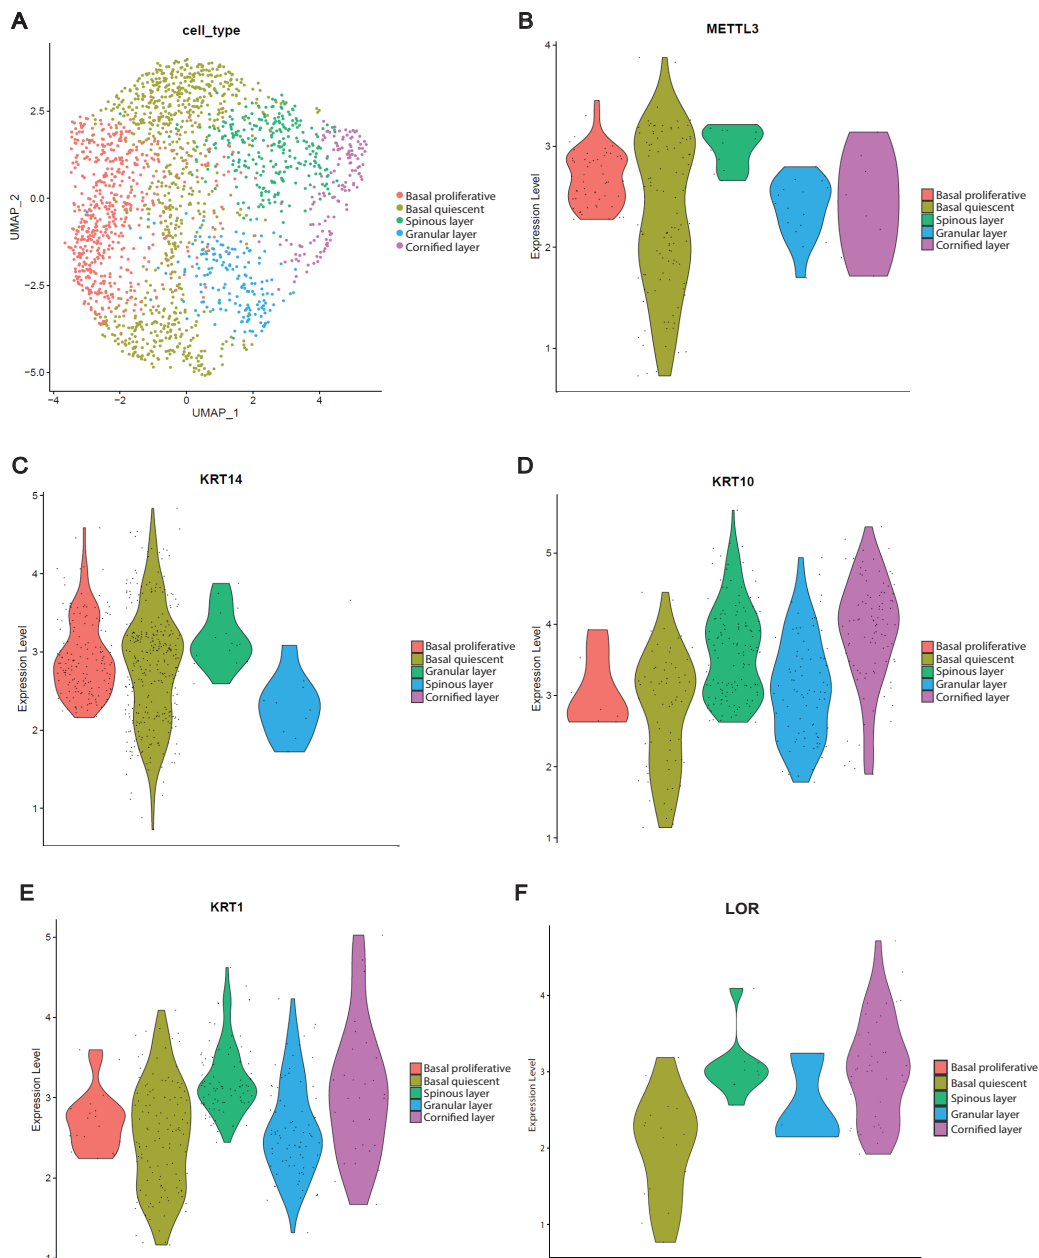

**Fig. S3. Single-cell expression analysis of human epidermal keratinocytes.** (A) Epidermal cell types identified in mice in a UMAP projection of scRNA-seq data (GTEx Portal dbGaP accession number phs000424.v9). Violin plots show gene expression in cells on the single-cell level. Each dot represents a single human keratinocyte. Statistically significant gene expression is observed only if a violin-shaped fitting area can be calculated. (B) *METTL3* expression is reduced in the more differentiated cornified layer in comparison to the basal and suprabasal layers of the epidermis similar to what is observed with *KRT14* (C). In contrast, *KRT10* (D), *KRT1* (E), and *LOR* (F) all display increased expression with differentiation.

Figure S4

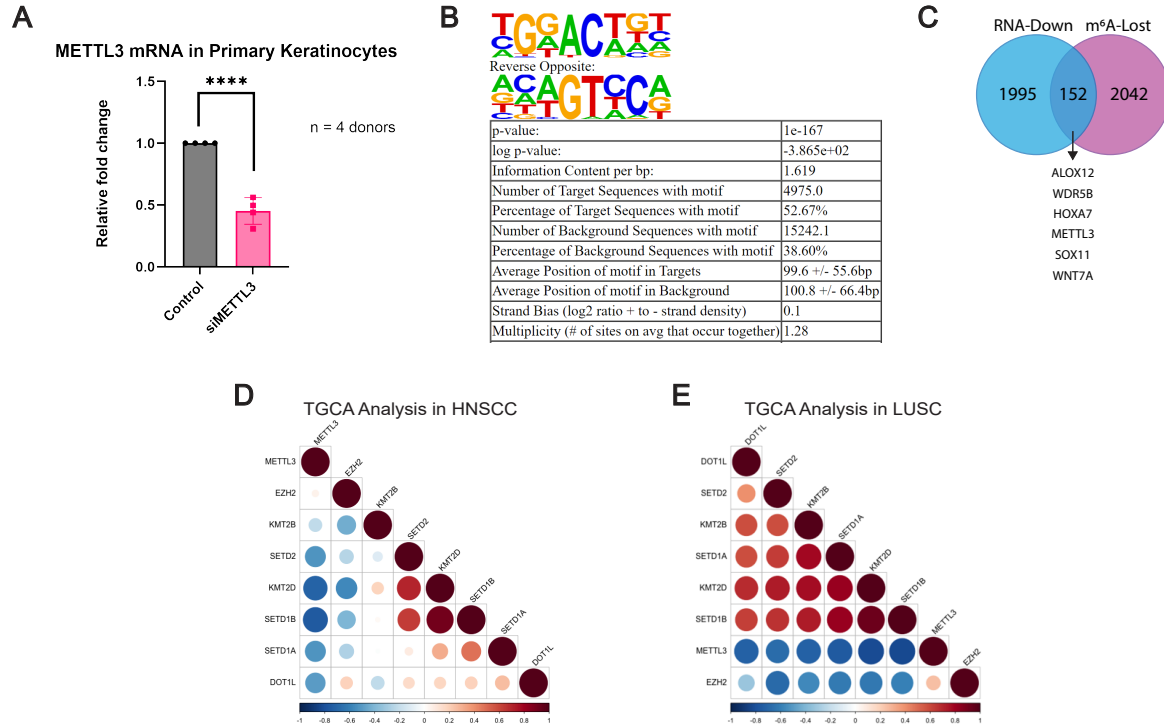

**Fig. S4. METTL3-m<sup>6</sup>A dynamics in epithelial tissues.** (A) RT-qPCR for METTL3 demonstrating knockdown with siMETTL3 treatment. (B) HOMER-identified enriched motifs for m<sup>6</sup>A peaks in proliferating epidermal progenitors (normal human epidermal keratinocytes, or NHEKs). (C) Overlap of transcripts that demonstrate a concomitant loss of mRNA expression by RNA-seq (blue) as well as a significant reduction in m<sup>6</sup>A enrichment by m<sup>6</sup>A-seq (purple) with depletion of Mettl3. TCGA analysis of Head and Neck Squamous Cell Carcinoma (HNSCC) (D) and Lung Squamous Cell Carcinoma (LUSC) (E) showing the inverse correlation of METTL3 expression and multiple histone methyltransferases.

Figure S5

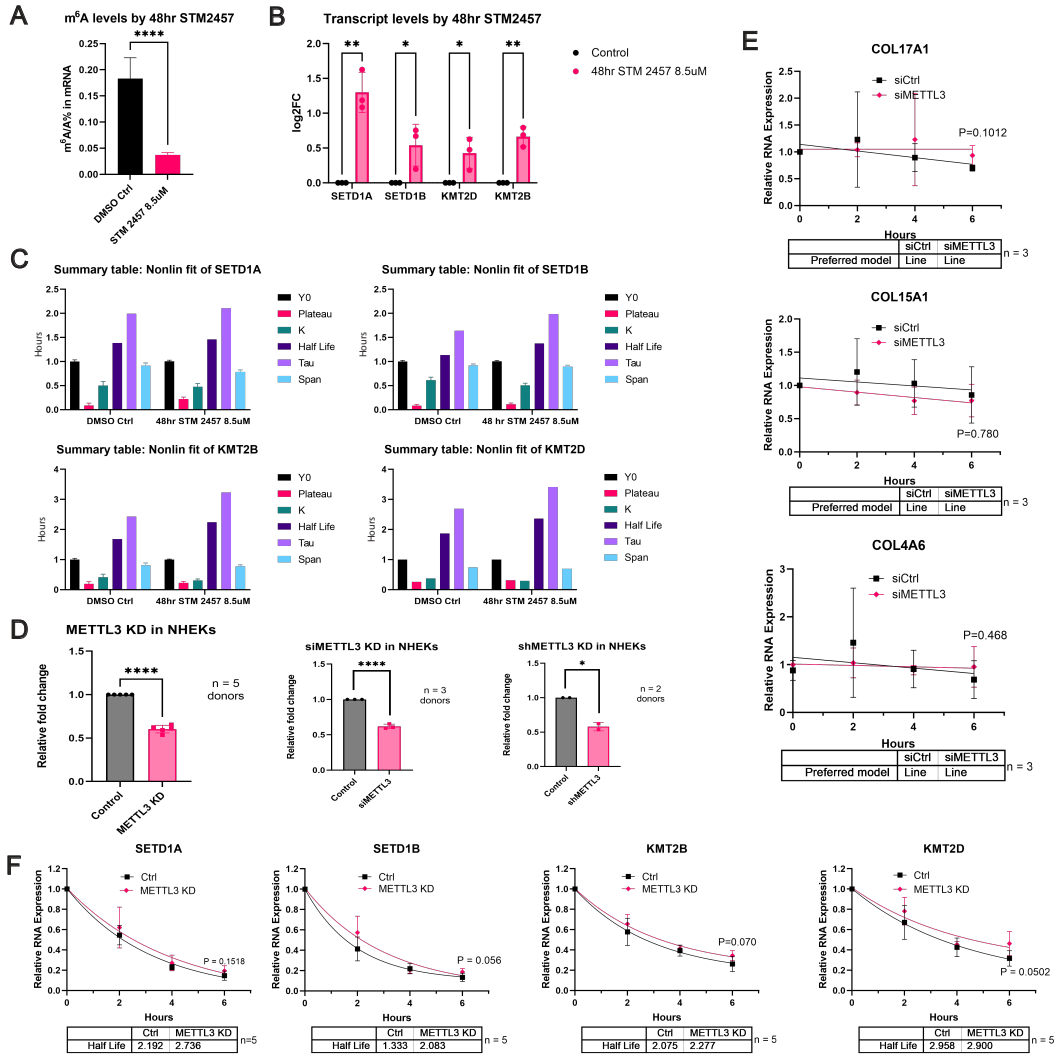

**Fig. S5. mRNA half-life is dysregulated with Mettl3 loss.** (A) Quantitative analysis of the m<sup>6</sup>A level by LC-MS/MS done in NHEKs demonstrates reduced global m<sup>6</sup>A with METTL3 catalytic inhibition by STM2457 treatment at 6 hr timepoint. (B) RT-qPCR was done in STM2457-treated NHEKs vs. DMSO vehicle control. A log<sub>2</sub> Fold Change of  $\pm 0.5$  and an adjusted p-value of  $<0.01$  was done to visualize the significant changes that recapitulate what is seen in the bulk RNA-seq done in *Mettl3*-eKO epidermis. Transcripts were normalized by *GAPDH*. (C) Non-linear, one phase decay fit summary that was used to calculate mRNA half-life ( $t_{1/2}$ ) of *SETD1A*, *SETD1B*, *KMT2B* and *KMT2D*. (D) RT-qPCR for METTL3 shows METTL3 knockdown when treated with siRNA or shRNA treatment (siMETTL3 KD and shMETTL3 KD were added to make METTL3-KD). (E) mRNA turnover assay to measure the mRNA half-life transcripts of *COL17A1*, *COL15A1* and *COL4A6* in NHEKs with METTL3 depletion show that the transcripts follow a linear model instead of a one phase decay model, meaning that the transcripts are stable and not undergoing mRNA degradation. Transcripts were normalized by *GAPDH*. (F) mRNA turnover assay to measure the mRNA half-life transcripts in epidermal progenitors demonstrates a trend in prolonged half-life of *SETD1A*, *SETD1B*, *KMT2B* and *KMT2D* transcripts with METTL3 depletion. Transcripts were normalized by *GAPDH*.



Figure S6

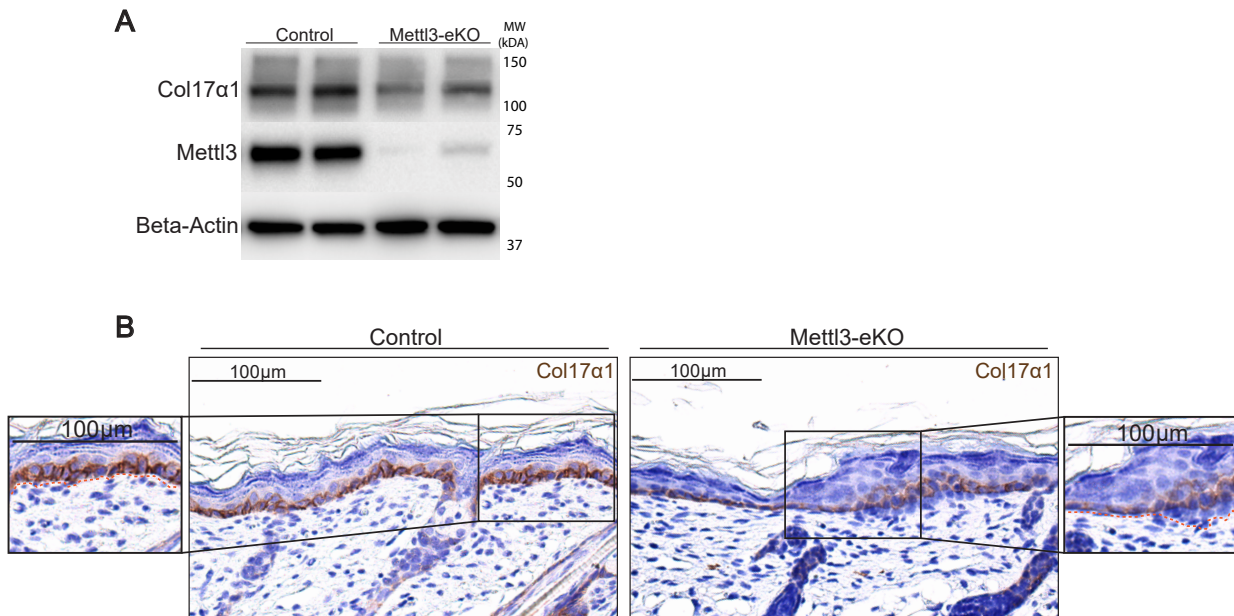

**Fig. S6. Collagen 17 alpha 1 is decreased with deletion of *Mettl3*.** (A) Western blot for Col17 $\alpha$ 1 in P6 mice epidermis. (B) IHC for Col17 $\alpha$ 1 in P6 mice epidermis.

## Supplementary Tables

### Antibodies

| Antibody          | Company           | Catalog Number | Application     |
|-------------------|-------------------|----------------|-----------------|
| Mettl3            | Abcam             | ab195352       | Immunoblot, IHC |
| Setd1a            | Invitrogen        | PA5-78298      | Immunoblot, IHC |
| H3K4me2           | Abcam             | ab7766         | IHC             |
| H3K4me3           | Abcam             | ab8580         | IHC             |
| Cytokeratin 14    | Abcam             | ab7800         | ICC, IF         |
| Cytokeratin 10    | Abcam             | ab76318        | IF              |
| Ki67              | Abcam             | ab15580        | IHC             |
| Filaggrin         | Abcam             | ab81468        | IHC             |
| Beta-Actin        | Cell Signaling    | 4970S          | Immunoblot      |
| Collagen XVII     | Novus Biologicals | NBP2-67316     | Immunoblot, IHC |
| m <sup>6</sup> A  | Synaptic Systems  | 202003         | ICC             |
| Alexa Fluor 555   | Invitrogen        | A31570         | ICC, IF         |
| Alexa Fluor 488   | Invitrogen        | A21206         | ICC, IF         |
| Rb IgG HRP Linked | Cell Signaling    | 7074S          | Immunoblot      |

### siRNAs and shRNAs

|                                                           |                              |
|-----------------------------------------------------------|------------------------------|
| Accell Human <i>METTL3</i> siRNA - SMARTpool              | Catalog ID: E-005170-00-0020 |
| Accell Non-targeting siRNA #1                             | Catalog ID: D-001910-01-20   |
| Sigma <i>METTL3</i> shRNA                                 | SKU: TRCN0000034717          |
| Sigma pLKO.1-puro Non-Mammalian shRNA Control Plasmid DNA | SKU: SHC002                  |
| STM2457 - Selleck Chem                                    | Catalog No: S9870            |

### Primers (Genotyping and RT-PCR)

|                               |                                                                   |
|-------------------------------|-------------------------------------------------------------------|
| <i>Mettl3</i> (mouse)         | F' 5-AAGTGCTGCCATGTGAATGA-3<br>R' 5-TAAAGTGGAAAGGGTCAGTC-3        |
| <i>Keratin 14-Cre</i> (mouse) | F' 5-GAACCTGATGGACATGG-3<br>R' 5-AGTGCGTTCGAACGCTAGAGCCTGT-3      |
| <i>METTL3</i> (human)         | F' 5-CAAGCTGCACTTCAGACGAA-3<br>R' 5-GCTTGCGGTGTGGTCTTT-3          |
| <i>SETD1A</i> (human)         | F' 5-TTGCCATGTCAGGTCCAAAAA-3<br>R' 5-CGTACTIONTACGGCACATATCCTTC-3 |
| <i>SETD1B</i> (human)         | F' 5-AGCGAGCTCCAGAACATGAC-3<br>R' 5-ATGGGTGTGAGGCATCTGTG-3        |
| <i>KMT2D</i> (human)          | F' 5-ATCCTGGAGACACCCATCAG-3<br>R' 5-GACAGGCTCAGGGTCAGTG-3         |
| <i>KMT2B</i> (human)          | F' 5-GGAGGAAGCAGCAAGCAGTA-3<br>R' 5-GCTCAGGTTTGGGGATTGT-3         |
| <i>COL17A1</i> (human)        | F' 5-GCAGAGCTGAGTAGTCGCAT-3<br>R' 5-AATTCAGACCCTCGCAGCAA-3        |
| <i>COL15A1</i> (human)        | F' 5-CTGGGAGTCCAGAGCTCATC-3                                       |

|                           |                                                            |
|---------------------------|------------------------------------------------------------|
|                           | R' 5-ATCAAGTGGAGGACCTGGTG-3                                |
| <i>COL4A6</i> (human)     | F' 5-AAAGGAGCCAGAGGAGATCG-3<br>R' 5-GAGGCCTCGAGACCCTTTAG-3 |
| <i>Beta-Actin</i> (human) | F' 5-TGAAGTGTGACGTGGACATC-3<br>R' 5-GCAGGAGCAATGATCTTGAT-3 |
| <i>GAPDH</i> (human)      | F' 5-ATCATCCCTGCCTCTACTGG-3<br>R' 5-GTCAGGTCCACCACTGACAC-3 |

**Data S1. (separate file)**

Supplemental Data Table S1: RNA-seq data

**Data S2. (separate file)**

Supplemental Data Table S2: m<sup>6</sup>A-seq data
